# Supplementary material
Source: PubMed Central journal article supplement (PMC8137518)
Supplement: NIHMS1649970-supplement-2.pdf [file NIHMS1649970-supplement-2.pdf]

# Chuang et al. Data Table S2

Figure 1E gene table

| T <sub>nonMet</sub> specific lethal | Met specific lethal |
|-------------------------------------|---------------------|
| Cdkn2b                              | Vmn1r95             |
| Vps11                               | Klf5                |
| Idi2                                | Slamf7              |
| 1700019B03Rik                       | Spata24             |
| Pcdhga12                            | Olfr338             |
| Olfr715                             | Katnb1              |
| Gpr132                              | BC051628            |
| Rpl28                               | Klf6                |
| Atpaf1                              | Nln                 |
| Zmpste24                            | Eif4a1              |
| Stag1                               | Tspo                |
| Sh2d1b2                             | Zfp114              |
| Zdhhc1                              | Parvg               |
| Fbxw11                              | Npas1               |
| Dnajc8                              | Slc12a9             |
| Gm5593                              | Cyp7a1              |
| Gtf3c1                              | Smug1               |
| Atp2b4                              | Otud5               |
| Gna14                               | Olfr901             |
| Pou2af1                             | Baiap211            |
| Cstb                                | Olfr1044            |
| Itgb2l                              | Dnajb4              |
| Fstl3                               | Mrpl10              |
| Arg1                                | Krtap3-3            |
| 1300018J18Rik                       | Mrpl14              |
| Fem1c                               | Tpr                 |
| Rsph3b                              | Slc7a1              |
| Jub                                 | Cry1                |
| Fgf7                                | Upb1                |
| Pcbp2                               | Usp26               |
| Ncor1                               | 1700009J07Rik       |
| Kbtbd3                              | Gja10               |
| Rp9                                 | Nudt15              |
| Psg23                               | Ick                 |
| 1700113I22Rik                       | Ndr3                |
| Crygn                               | Gpatch1             |
| Slc31a1                             | Pld1                |
| Zfp111                              | St8sia4             |
| Grb7                                | Gspt2               |
| Taf13                               | Tnrc18              |
| Cib1                                | Tead1               |
| Il1f6                               | Fads6               |
| Ptp4a3                              | Olfr1418            |
| Ccdc148                             | Mdp1                |
| Ccdc109a                            | Plcl1               |
| Cpn2                                | Ppfia3              |
| D9Ert402e                           | Cldn6               |
| Slc25a14                            | Crk                 |
| Med12                               | Mzt2                |
| Hnf4a                               | Ciz1                |

Supplementary Figure S1E gene table

| 368T1 specific lethal | 394T4 specific lethal | 238N1 specific lethal | 482N1 specific lethal |
|-----------------------|-----------------------|-----------------------|-----------------------|
| Slc25a14              | Mal                   | Rnf41                 | Ubash3a               |
| D9Ert402e             | H2-Ab1                | Diap2                 | Hmga2                 |
| Med12                 | Actr5                 | Eif4a1                | Fut1                  |
| Ptp4a3                | Olfr1182              | Snph                  | Yme111                |
| Nfyc                  | Vmn1r213              | 1110034G24Rik         | Thumpd3               |
| Npr1                  | BC049762              | AI593442              | Hipk1                 |
| Pou2af1               | Pnp                   | Grb7                  | Ccdc61                |
| Kl                    | Hmgcl                 | Srf                   | Stradb                |
| Ttk                   | Ubxn7                 | Akap8                 | Spata24               |
| Pappa                 | Olfr1014              | Ctnnb1                | 4921522P10Rik         |
| Tssk2                 | Ube2v1                | Dpp6                  | Gm270                 |
| Kif13a                | Hist1h2bh             | Gabarapl2             | Nktr                  |
| Kifc5b                | Clns1a                | Pbp2                  | Taf11                 |
| Prkar2b               | Hemgn                 | Epha6                 | Rasa3                 |
| Cacnb2                | Fam193b               | Dst                   | Atat1                 |
| Capn3                 | Mapk8ip2              | Klk1b16               | Med26                 |
| Uimc1                 | Pcbp2                 | Ntn4                  | Kctd16                |
| Pfkm                  | Hinfp                 | Naa35                 | BC051628              |
| Tcp10c                | Arl9                  | Itgb2l                | Aym1                  |
| Iqcf4                 | Stt3a                 | Gm5593                | Cst8                  |
| Sesn1                 | Rac3                  | Cdkn2b                | Xlr5a                 |
| Slc17a7               | Dnajc8                | D5Ert4579e            | Esr1                  |
| Neurod2               | B230317F23Rik         | Plau                  | Gm5414                |
| Olfr512               | Zik1                  | Rpl22l1               | Anxa11                |
| Mbd3l1                | Bcap29                | Chrm1                 | Vmn1r41               |
| Il1f6                 | Lifr                  | Cdk16                 | Fbxw7                 |
| Pcdhga12              | Cib1                  | Tsc2                  | Nup210                |
| Tyr                   | Fem1c                 | Zfp68                 | Pcdhb15               |
| 1700013N18Rik         | Crygn                 | Rpl41                 | Vmn1r228              |
| Nrsn2                 | Isir                  | Stk36                 | Acsbg1                |
| Mccc1                 | Mxd3                  | Olfr945               | Pdyn                  |
| Lrfn3                 | Gfer                  | Hhipl2                | Als2cr12              |
| Thsd4                 | Angel2                | Ctsw                  | Car14                 |
| Trhr                  | Cdh2                  | Scp2                  | Atp5s                 |
| Tpm4                  | Hnf4a                 | 0610012H03Rik         | 8430419L09Rik         |
| Pnpt1                 | Wfdc8                 | Tdrd1                 | Fastk                 |
| Cbx6                  | Hsp90b1               | Inpp5k                | Pbsn                  |
| Was                   | Olfr1408              | Atad2                 | Mdp1                  |
| Slc26a2               | Gpr132                | Stard6                | Olfr19                |
| Tec                   | Lztf1                 | 9530077C05Rik         | Mrpl52                |
| Slc25a29              | Zmynd19               | Olfr155               | 5730403B10Rik         |
| Slc18a2               | LOC100047429          | Kcnj2                 | Hyal5                 |
| Ttpal                 | Gm436                 | Cnot2                 | Ythdc2                |
| C3ar1                 | Tstd1                 | Olfr1044              | Bach2                 |
| Defb1                 | Ccdc148               | Krtap3-3              | Gm4477                |
| Sgcz                  | Tigit                 | Parvg                 | Phf7                  |
| Rpl28                 | Prpf40a               | Ncor1                 | Klf6                  |
| Sh2d1b2               | Pcgf2                 | Fam134b               | Txlng                 |
| LOC100862447          | Adamts14              | Ttc29                 | Gpank1                |
| Atp2b4                | Wdyhv1                | Wdr13                 | 2310033P09Rik         |
